# Supplementary material
Source: publisher site journal article supplement (https://www.spandidos-publications.com/7440/downloadSupplementary)

Figure S1. Final size of HT-29 xenograft tumors. Tumors were obtained from mice after administering gossypin (0 or 100 mg/kg) for 28 days. HT-29 cells were administered subcutaneously into both shoulders of each mouse, resulting in two tumors per mouse; consequently, there were a total of 10 tumors in each group.

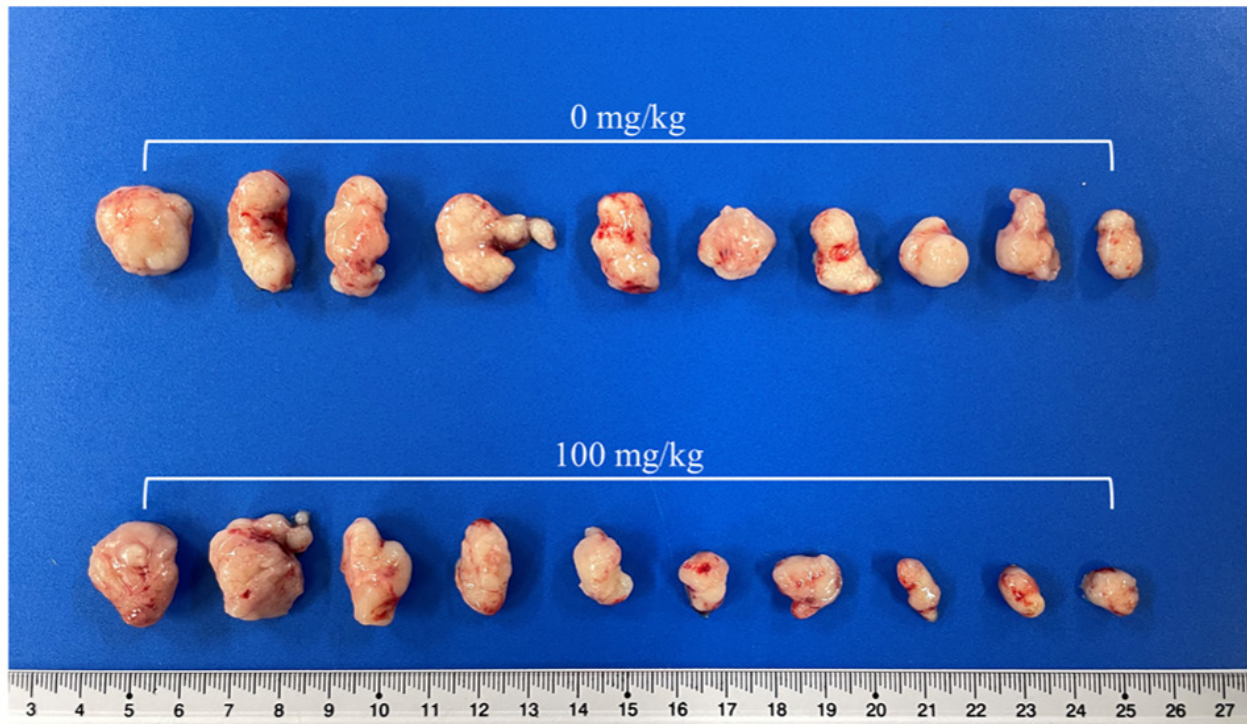

Supplement: Supplementary file 1 [file downloadSupplementary]
